# Supplementary material
Source: PubMed Central journal article supplement (PMC4468713)
Supplement: AAC.00341-15_zac007154083so1.pdf [file AAC.00341-15_zac007154083so1.pdf]

## Equation used for simulation

The final estimate for Cl/F, covariates effect and variance were used for the simulations as follows:

$$\text{Log (Cl/F)} = \log(6.22) + 0.0107 * (\text{Clcr} - 79.08) + 0.75 * (\log \text{wt} - \log 56) + \text{ETA} \quad (5)$$

(The 6.22 is the typical value of Cl/F in the population, Clcr is the individual creatinine clearances and wt is the individual bodyweights. ETA is the individual random effect and follows a normal distribution with a mean of 0 and standard deviation of 0.264)

## Simulations with R

#First we uploaded the excel design file which contains demographic and dosing information for the 10,000 virtual patients, the file was named LEVO,

# file header shown below, wt is weight, clcr is creatinine clearance

```
> head(LEVO)
```

```
  ID dose  wt  clcr
1  1 1000 54.0 121.07143
2  2 1000 50.8  96.76190
3  3 1000 54.0 101.78571
4  4 1000 53.2  69.78395
5  5 1000 54.2  99.63552
6  6 1000 46.9  50.62222
```

#The R code used for the simulations is shown below

```
set.seed(1234)
```

```
e<-rnorm(10000,0,0.264) # setting the eta distribution for Cl/F
```

```
logwt=log(LEVO$wt) # log transforming body weight
```

```
A=(LEVO$clcr-79.08)*0.0107 # slope effect of clcr (creatinine clearance) scaled to 79.08 L/hr
```

```
B=(logwt-log(57.44))*0.75 # slope effect of log transformed bodyweight scaled to log 55.5 kg
```

```
logcli=log(6.22)+A+B+e # setting equation for Cl/F, 6.22 is the typical value of Cl/F in the population
```

```
cli=exp(logcli) # returning Cl/F to natural scale
```

```
AUC=LEVO$dose/cli # calculating AUC 0-24
```

fAUC=0.6\*AUC # setting free fraction for LEVO at 0.6

# Target attainment calculated at an MIC = 2 as follows

MIC=2

TA <- fAUC/MIC

100\*sum(TA > 53)/10000

100\*sum(TA > 100)/10000
